# Supplementary material for: 3 minutes to precisely measure morphogen concentration
Source: PubMed Central journal article supplement (PMC6221364; doi:10.1371/journal.pgen.1007676), 2018-10-26
Supplement: pgen.1007676.s001.pdf [file pgen.1007676.s001.pdf]

## SI Text. Supplementary Molecular Biology

**BAC recombineering:** the *24xMS2* cassette was first cloned into a pL-452-N-eGFP plasmid (Addgene #19173) in 3' of a lox-Kan-lox selection cassette. Second, ~100 bp primers homologous to flanking regions of either the 5'-UTR or 3'-UTR regions of *hb* were generated to create recombination sites (respectively called 5'HR and 3'HR) and used to amplify 5'Fw-*24xMS2*-lox-KAN-lox-3'Rv PCR products. These PCR products were gel purified and electroporated into SW102 *E. coli* strain containing the *hb-18kb-BAC* (which contains a Chloramphenicol selection cassette) for recombination. The recombinant colonies were selected on Kanamycin (Kan) and Chloramphenicol (Cm) plates and the recombinant BAC was purified and electroporated into SW106 *E. coli* strains that carry an L-arabinose-inducible Cre gene for Kan selection cassette removal. The Kan<sup>S</sup> Cm<sup>R</sup> recombinant colonies were picked. The integrity of the MS2 loops sequence and the junctions of the insert at the recombination sites were verified by PCR, digestion and sequencing. The three BACs (*hb-18kb-BAC*, *5'MS2-18kb-BAC* and *3'MS2-18kb-BAC*) were inserted by BestGene at the VK18 recombination site on the chromosome 2R (# 9736, Bloomington) [1].

HR Primers used for recombination within the 5'UTR or 3'UTR of *hb*.

|                    |    |                                                                                                                                |
|--------------------|----|--------------------------------------------------------------------------------------------------------------------------------|
| 5'UTR of <i>hb</i> | Fw | AAATGAAAAACAAGCGGAAAAAAGAGGAAAAAACTCGACG<br>CAGGCGCAGTGCATGAATGAATAAATGAATATGCCACTAAC<br>CCCACTCTCTCTtctcgcatggacgagctgtacaag  |
|                    | Rv | TGTACCAGGCGTTGTGCTGCTCGTAGTTGGTCGTGGCTGTCGT<br>CTCCAGTTCTGCATCTTGCGGCTCTAGACGGCTGTAATGGA<br>TAAGAAAACgcgccgctctagaactagtgatc   |
| 3'UTR              | Fw | TGTGCGGCGAGAAGTGCGACGGACCCGTCGGCCTCTTCGTTC<br>ACATGGCCAGGAATGCTCACTCCTAAGTTCCCATCACCATCA<br>CCTTGTTATtctcgcatggacgagctgtacaag  |
|                    | Rv | GTACAATTTTCGACAACAAAATAATGTTTGGAAAACCTTATGCT<br>ACGAATATATAAATTCTGGACAACGATTATATGATAATAGT<br>GATAAATAATgcgccgctctagaactagtgatc |

Upper cases are homologous to *hb* sequence and lower cases are homologous to pL-452-N-eGFP plasmid

**Sequence of the primers used to remove the Zelda binding site from the iRFP coding sequence:** forward primer: AAAAAGATCTatggcgcgtaaggctgatctcacctctcgatcgcgagccgatccac  
atccccggcagcattcagccgtgctgctctctagcctgagcag, with the mutated Zelda binding site underlined;  
reverse primer: AAAAAGGATCCtagcgttggtggtggcggcggtgaagtgc).

**Sequence of the  $\Delta$ Zelda MS2 cassette:**

5'GATCCTACGGTACTTATTGCCAAGAAAGCACGAGCATCAGCCGTGCCTCAATGTCGAATCT  
GCAAACGACGACGATCACGCGTCGCTCCAGTATTCCAGGGTTCATCAGATCCTACGGTACTT  
ATTGCCAAGAAAGCACGAGCATCAGCCGTGCCTCAATGTCGAATCTGCAAACGACGACGAT  
CACGCGTCGCTCCAGTATTCCAGGGTTCATCAGATCCTACGGTACTTATTGCCAAGAAAGCA  
CGAGCATCAGCCGTGCCTCAATGTCGAATCTGCAAACGACGACGATCACGCGTCGCTCCAGT  
ATTCCAGGGTTCATCAGATCCTACGGTACTTATTGCCAAGAAAGCACGAGCATCAGCCGTGC  
CTCAATGTCGAATCTGCAAACGACGACGATCACGCGTCGCTCCAGTATTCCAGGGTTCATCA  
GATCCTACGGTACTTATTGCCAAGAAAGCACGAGCATCAGCCGTGCCTCAATGTCGAATCTG  
CAAACGACGACGATCACGCGTCGCTCCAGTATTCCAGGGTTCATCAGATCCTACGGTACTTA  
TTGCCAAGAAAGCACGAGCATCAGCCGTGCCTCAATGTCGAATCTGCAAACGACGACGATC  
ACGCGTCGCTCCAGTATTCCAGGGTTCATCAGATCCTACGGTACTTATTGCCAAGAAAGCAC  
GAGCATCAGCCGTGCCTCAATGTCGAATCTGCAAACGACGACGATCACGCGTCGCTCCAGTA  
TTCCAGGGTTCATCAGATCCTACGGTACTTATTGCCAAGAAAGCACGAGCATCAGCCGTGCC  
TCAATGTCGAATCTGCAAACGACGACGATCACGCGTCGCTCCAGTATTCCAGGGTTCATCAG  
ATCCTACGGTACTTATTGCCAAGAAAGCACGAGCATCAGCCGTGCCTCAATGTCGAATCTGC  
AAACGACGACGATCACGCGTCGCTCCAGTATTCCAGGGTTCATCAGATCCTACGGTACTTAT  
TGCCAAGAAAGCACGAGCATCAGCCGTGCCTCAATGTCGAATCTGCAAACGACGACGATCA  
CGCGTCGCTCCAGTATTCCAGGGTTCATCAGATCCTACGGTACTTATTGCCAAGAAAGCACG  
AGCATCAGCCGTGCCTCAATGTCGAATCTGCAAACGACGACGATCACGCGTCGCTCCAGTAT  
TCCAGGGTTCATCAGATCCTACGGTACTTATTGCCAAGAAAGCACGAGCATCAGCCGTGCCT  
CAATGTCGAATCTGCAAACGACGACGATCACGCGTCGCTCCAGTATTCCAGGGTTCATCA-3'
