# Supplementary material for: 3 minutes to precisely measure morphogen concentration
Source: PubMed Central journal article supplement (PMC6221364; doi:10.1371/journal.pgen.1007676), 2018-10-26
Supplement: pgen.1007676.s005.pdf [file pgen.1007676.s005.pdf]

## **Evolution of the transcription pattern steepness over time**

At a given time, the *hb* pattern is characterized by the snapshot proximal *hb* promoter's activity  $P_{\text{bright}}$ , which takes value of 0 if the nucleus has no active locus and 1 if the nucleus has an active locus at the given time. At a given position,  $P_{\text{bright}}$  has a mean value of  $P_{\text{SPOT}}$  (as described in the Main manuscript). We fit the values of  $P_{\text{bright}}$  along the AP axis with a sigmoid function and infer on the pattern steepness  $H(t)$  as a function of time (S8 Fig) for each nuclear cycle.
