# Supplementary material for: 3 minutes to precisely measure morphogen concentration
Source: PubMed Central journal article supplement (PMC6221364; doi:10.1371/journal.pgen.1007676), 2018-10-26
Supplement: pgen.1007676.s007.pdf [file pgen.1007676.s007.pdf]

## Comparing the noise in positional readout between models

With the fitted parameters (S2 Table), we compare the precision of gene expression readout  $f_T$  between the case  $N=6$ ,  $N=9$  at the boundary position ( $X=X_0$ ). Here, the readout is defined as the mean duration the  $hb$  gene is activated at steady-state:

$$f_T = \int_{t=0}^T \frac{1}{T} n(t). \quad (14)$$

with  $n(t)$  being the trajectory of the gene activity state over time.  $n(t)$  is 1 when the gene is activated and 0 otherwise. The relative noise in the readout  $CV_P$  is defined as follow:

$$CV_P = \frac{\delta f_T}{\langle f_T \rangle} = \sqrt{\frac{\langle f_T^2 \rangle - \langle f_T \rangle^2}{\langle f_T \rangle^2}}, \quad (15)$$

in which  $\langle f_T \rangle = 0.5$  and  $\langle f_T^2 \rangle$  are respectively the first and second moments of the readout at the pattern's boundary ( $X=X_0$ ). Let us define a vector  $s_{fire}$  where  $s_{fire,i} = \alpha_{i,Si}$ .  $\langle f_T^2 \rangle$  is calculated numerically from the transition matrix  $U$  [9]:

$$\langle f_T \rangle = \frac{2\alpha^T}{T} \left[ \int_0^T dt (T-t) e^{Ut} \right] s_{fire}, \quad (15)$$

The precision of gene expression readout between the model with  $N=6$  and  $N=9$  are shown in S12 Fig. Also shown is precision from the “no cooperativity” case, where interactions of TF with the binding sites are independent ( $k_{-i} = i \cdot k_{-N}/N$ ).
