# Supplementary material for: 3 minutes to precisely measure morphogen concentration
Source: PubMed Central journal article supplement (PMC6221364; doi:10.1371/journal.pgen.1007676), 2018-10-26
Supplement: pgen.1007676.s008.pdf [file pgen.1007676.s008.pdf]

## Supporting References

1. Venken K.J.T., He Y., Hoskins R.A., and Bellen H.J. (2006). P[acman]: A BAC Transgenic Platform for Targeted Insertion of Large DNA Fragments in *D. melanogaster*. *Science* *314*, 1747-1751.
2. Deneke V.E., Melbinger A., Vergassola M., and Di Talia S. (2016). Waves of Cdk1 Activity in S Phase Synchronize the Cell Cycle in *Drosophila* Embryos. *Developmental cell* *38*, 399-412.
3. Gregor T., Wieschaus E.F., McGregor A.P., Bialek W., and Tank D.W. (2007). Stability and Nuclear Dynamics of the Bicoid Morphogen Gradient. *Cell* *130*, 141-152.
4. Driever W., and Nusslein-Volhard C. (1989). The bicoid protein is a positive regulator of hunchback transcription in the early *Drosophila* embryo. *Nature* *337*, 138-143.
5. Estrada J., Wong F., DePace A., and Gunawardena J. (2016). Information Integration and Energy Expenditure in Gene Regulation. *Cell* *166*, 234-244.
6. Gregor T., Tank D.W., Wieschaus E.F., and Bialek W. (2007). Probing the Limits to Positional Information. *Cell* *130*, 153-164.
7. Porcher A., Abu-Arish A., Huart S., Roelens B., Fradin C., and Dostatni N. (2010). The time to measure positional information : maternal Hunchback is required for the synchrony of the Bicoid transcriptional response at the onset of zygotic transcription. *Development* *137*, 2795-2804.
8. Abu-Arish A., Porcher A., Czerwonka A., Dostatni N., and Fradin C. (2010). Fast mobility of Bicoid captured by fluorescent correlation spectroscopy : implication for the rapid establishment of its gradient *Biophysical Journal* *99*, L33-L35.
9. Tran H., Desponds J., Perez-Romero C.A., Coppey M., Fradin C., Dostatni N., and Walczak A.M. (in prep). Precision in a rush: hunchback pattern formation in a limited time. To be submitted and deposited on the Bioarxiv shortly.
10. Garcia Hernan G., Tikhonov M., Lin A., and Gregor T. (2013). Quantitative Imaging of Transcription in Living *Drosophila* Embryos Links Polymerase Activity to Patterning. *Current Biology* *23*, 2140-2145.
11. Desponds J., Tran H., Ferraro T., Lucas T., Perez Romero C., Guillou A., Fradin C., Coppey M., Dostatni N., and Walczak A.M. (2016). Precision of Readout at the hunchback Gene: Analyzing Short Transcription Time Traces in Living Fly Embryos. *PLOS Computational Biology* *12*, e1005256.
12. Coulon A., Ferguson M.L., de Turris V., Palangat M., Chow C.C., and Larson D.R. (2014). Kinetic competition during the transcription cycle results in stochastic RNA processing. *eLife* *3*, e03939.
13. Fukaya T., Lim B., and Levine M. (2017). Rapid Rates of Pol II Elongation in the *Drosophila* Embryo. *Current biology* : CB *27*, 1387-1391.
14. Gillespie D.T. (1976). A general method for numerically simulating the stochastic time evolution of coupled chemical reactions. *Journal of Computational Physics* *22*, 403-434.
15. Lloyd-Price J., Gupta A., and Ribeiro A.S. (2012). SGNS2: a compartmentalized stochastic chemical kinetics simulator for dynamic cell populations. *Bioinformatics (Oxford, England)* *28*, 3004-3005.
