# Supplementary material for: 3 minutes to precisely measure morphogen concentration
Source: PubMed Central journal article supplement (PMC6221364; doi:10.1371/journal.pgen.1007676), 2018-10-26

**S8 Fig.**

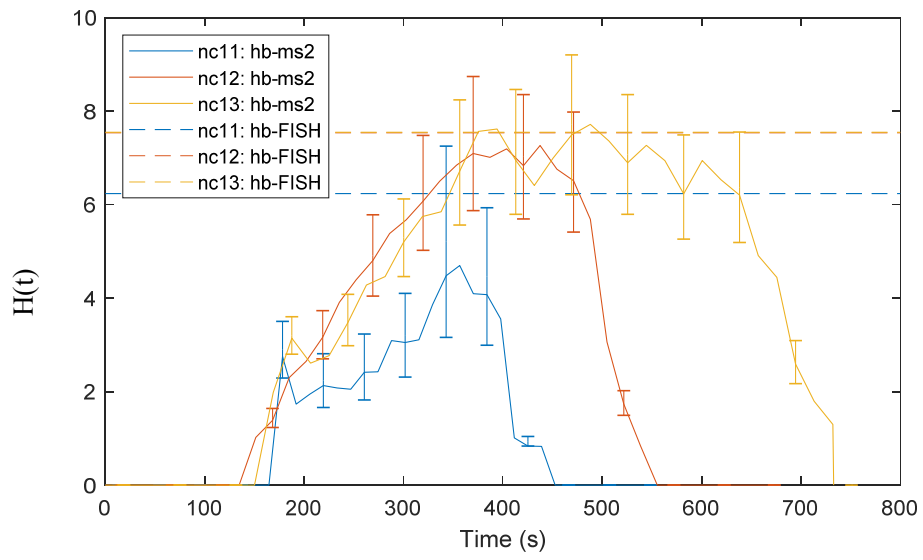

Supplement: pgen.1007676.s016.pdf [file pgen.1007676.s016.pdf]
