# Supplementary material for: 3 minutes to precisely measure morphogen concentration
Source: PubMed Central journal article supplement (PMC6221364; doi:10.1371/journal.pgen.1007676), 2018-10-26
Supplement: pgen.1007676.s021.pdf [file pgen.1007676.s021.pdf]

**S1 Table**

| Nuclear cycle | Feature      | $P_{\text{active}}$ | $t_{\text{active}}$   | $\Sigma I$            | $\mu I$               |
|---------------|--------------|---------------------|-----------------------|-----------------------|-----------------------|
| 11            | $X_0$ (% EL) | -0.1 (-1.2;1)       | -0.2 (-1.2;0.8)       | -0.5 (-1.8;0.8)       | -0.3 (-1.4;0.8)       |
|               | $H$          | 7.7 (4.2;14.0)      | 16.0 (8.1; $\infty$ ) | 17.2 (7.2; $\infty$ ) | 15.0 (7.8; $\infty$ ) |
| 12            | $X_0$ (% EL) | 0 (-0.3;0.3)        | -2.7 (-3.1;-2.3)      | -4.3 (-4.9;-3.7)      | -2.5 (-3.0;-2.0)      |
|               | $H$          | 11.2 (9.2;13.9)     | 7.8 (6.6;9.3)         | 6.9 (5.8;8.5)         | 8.1 (6.7;10.1)        |
| 13            | $X_0$ (% EL) | -0.9 (-1.2;-0.6)    | -4.3 (-4.6;4.0)       | -7.0 (-7.5;-6.5)      | -4.7 (-5.2;-4.3)      |
|               | $H$          | 12.6 (10.7 15.0)    | 8.2 (7.2;9.3)         | 7.1 (6.2;8.3)         | 7.3 (6.3;8.4)         |
