# Supplementary material for: 3 minutes to precisely measure morphogen concentration
Source: PubMed Central journal article supplement (PMC6221364; doi:10.1371/journal.pgen.1007676), 2018-10-26
Supplement: pgen.1007676.s022.pdf [file pgen.1007676.s022.pdf]

**S2 Table**

| $\bar{k}^*$                  | N=6   | N=7    | N=8    | N=9    | N=10  | N=6<br><i>Ind.</i> |
|------------------------------|-------|--------|--------|--------|-------|--------------------|
| $k_{-1}$ (s <sup>-1</sup> )  | 21.34 | 31.02  | 1.12   | 4.20   | 0.03  | 0.48               |
| $k_{-2}$ (s <sup>-1</sup> )  | 1.50  | 0.92   | 16.15  | 8.14   | 36.46 | 0.97               |
| $k_{-3}$ (s <sup>-1</sup> )  | 0.51  | 0.51   | 1.87   | 2.01   | 0.39  | 1.46               |
| $k_{-4}$ (s <sup>-1</sup> )  | 2.47  | 1.60   | 2.12   | 1.59   | 4.33  | 1.94               |
| $k_{-5}$ (s <sup>-1</sup> )  | 0.19  | 0.82   | 1.25   | 1.20   | 1.59  | 2.43               |
| $k_{-6}$ (s <sup>-1</sup> )  | 0.016 | 0.84   | 0.31   | 0.47   | 3.10  | 2.91               |
| $k_{-7}$ (s <sup>-1</sup> )  | /     | 0.011  | 0.80   | 1.85   | 0.40  | /                  |
| $k_{-8}$ (s <sup>-1</sup> )  | /     | /      | 0.013  | 0.19   | 0.76  | /                  |
| $k_{-9}$ (s <sup>-1</sup> )  | /     | /      | /      | 0.025  | 0.31  | /                  |
| $k_{-10}$ (s <sup>-1</sup> ) | /     | /      | /      | /      | 0.023 | /                  |
| $H(\bar{k})$                 | 5.15  | 5.48   | 6.11   | 6.56   | 6.69  | 1.31               |
| $s(\bar{k})$                 | 0.43  | 0.45   | 0.43   | 0.44   | 0.44  | 0.48               |
| p-value                      | 1     | 0.0050 | 0.0044 | 0.0133 | 0.645 | /                  |
| BIC                          | 45.7  | 40.7   | 35.4   | 32.1   | 24.7  | 212.6              |
